# Supplementary material for: Manipulable Electronic and Optical Properties of Two-Dimensional MoSTe/MoGe2N4 van der Waals Heterostructures
Source: MDPI journal article supplement (doi:10.3390/nano11123338), 2021-12-08
Supplement: s1 [file s1]

Supplementary Materials

# Manipulable Electronic and Optical Properties of Two-Dimensional MoSTe/MoGe<sub>2</sub>N<sub>4</sub> van der Waals Heterostructures

Jiali Wang <sup>1</sup>, Xiuwen Zhao <sup>1</sup>, Guichao Hu <sup>1</sup>, Junfeng Ren <sup>1,2,\*</sup> and Xiaobo Yuan <sup>1,\*</sup>

<sup>1</sup> School of Physics and Electronics, Shandong Normal University, Jinan 250358, China; 2020020533@stu.sdnu.edu.cn (J.W.); xwzhao@sdnu.edu.cn (X.Z.); hgc@sdnu.edu.cn (G.H.)

<sup>2</sup> Shandong Provincial Engineering and Technical Center of Light Manipulations & Institute of Materials and Clean Energy, Shandong Normal University, Jinan 250358, China

\* Correspondence: renjf@sdnu.edu.cn (J.R.); yxb@sdnu.edu.cn (X.Y.)

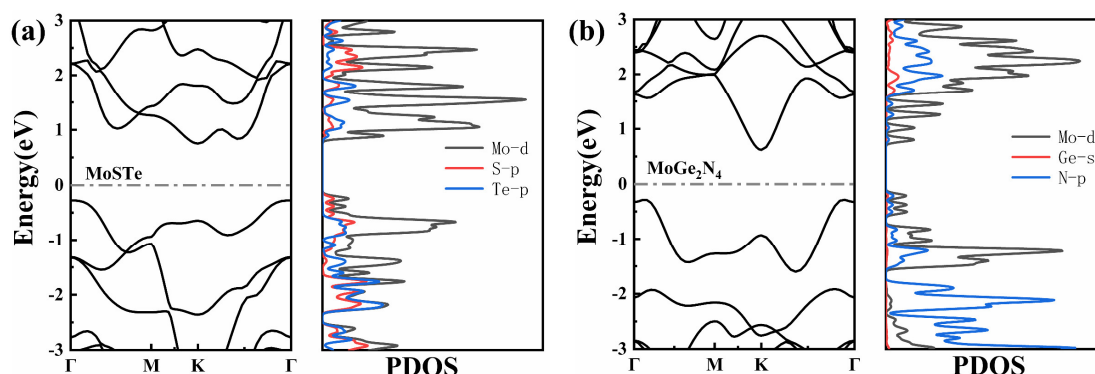

**Figure S1.** Band structures and PDOS of (a) Janus MoSTe monolayer and (b) MoGe<sub>2</sub>N<sub>4</sub> monolayer, respectively. The Fermi levels are set to zero.

**Table S1.** : Binding energies ( $E_b$ ) of the optimized MoSTe/MoGe<sub>2</sub>N<sub>4</sub> vdWH for the twelve different stacking patterns.

| Heterostructure | Te <sub>1</sub> | Te <sub>2</sub> | Te <sub>3</sub> | Te <sub>4</sub> | Te <sub>5</sub> | Te <sub>6</sub> |
|-----------------|-----------------|-----------------|-----------------|-----------------|-----------------|-----------------|
| $E_b$ (meV)     | -6.7680         | -6.7679         | -6.7671         | -6.7710         | -6.7670         | -6.7708         |
| Heterostructure | S <sub>1</sub>  | S <sub>2</sub>  | S <sub>3</sub>  | S <sub>4</sub>  | S <sub>5</sub>  | S <sub>6</sub>  |
| $E_b$ (meV)     | -6.7396         | -6.7407         | -6.7405         | -6.7434         | -6.7427         | -6.7394         |

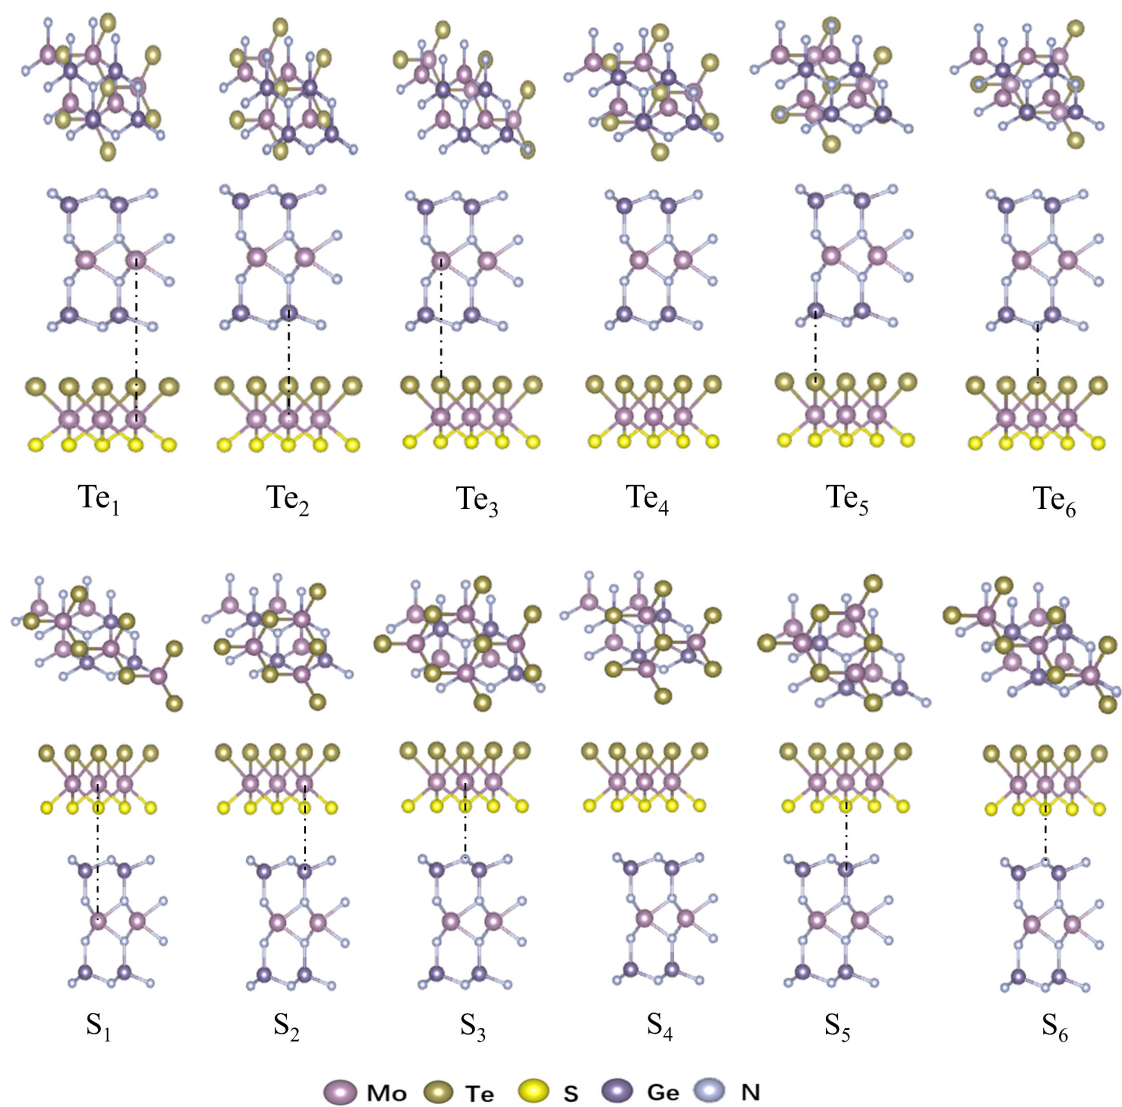

**Figure S2.** The optimized top and side views of the MoTe/MoGe<sub>2</sub>N<sub>4</sub> vdWH for twelve different stacking patterns.

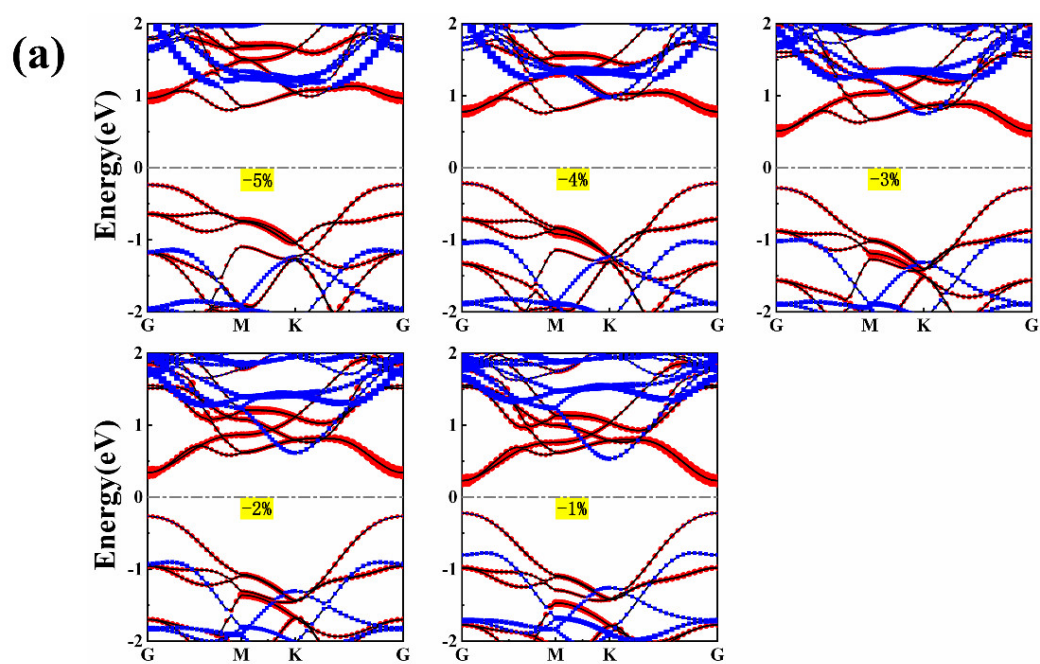

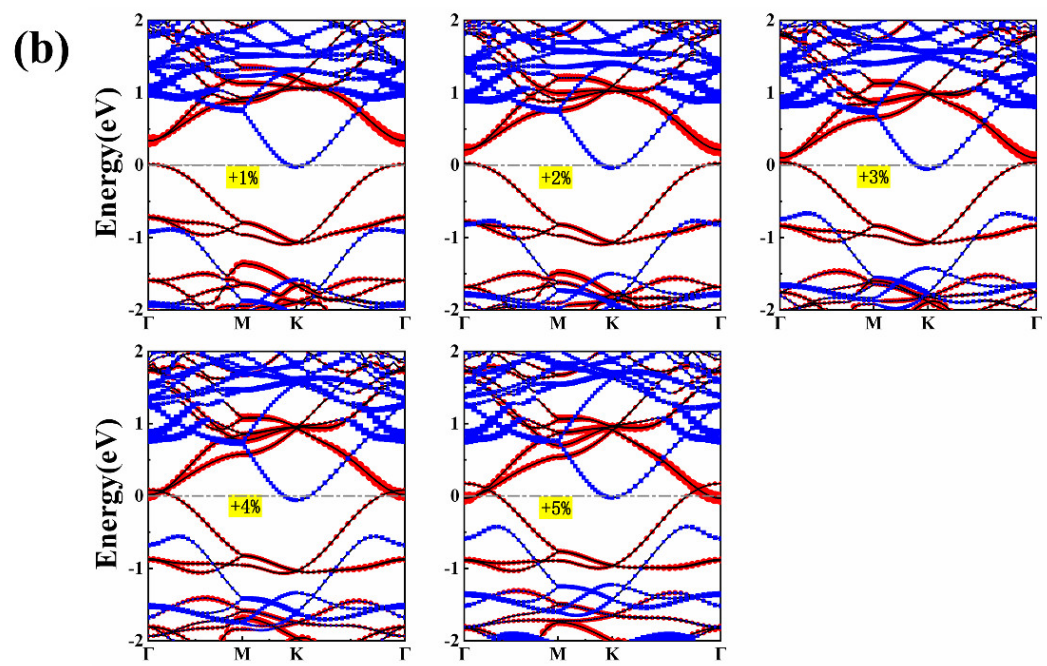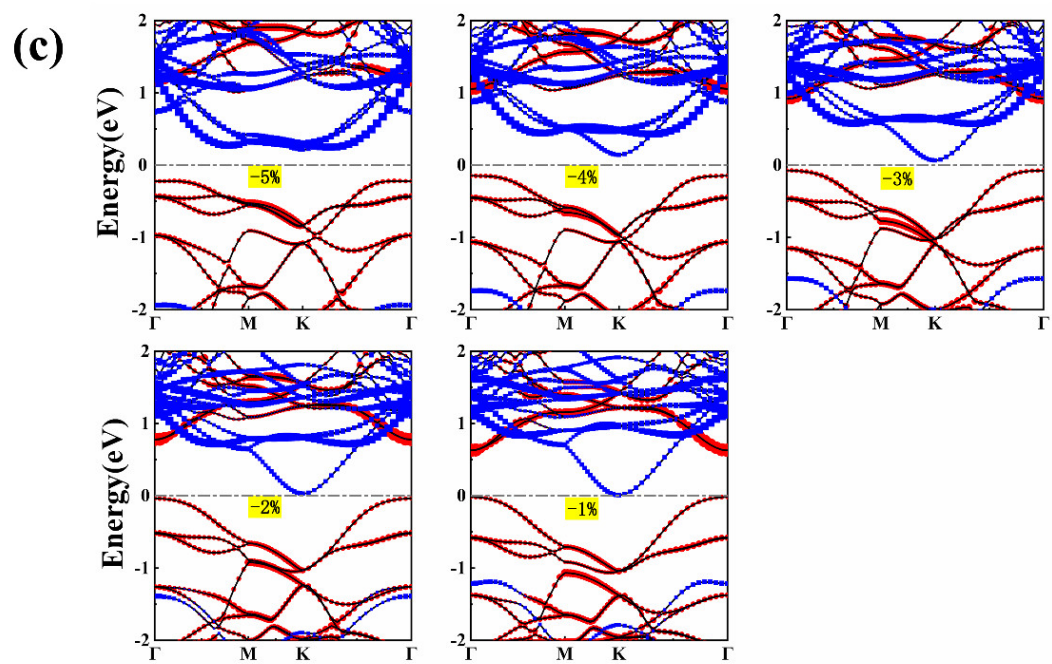



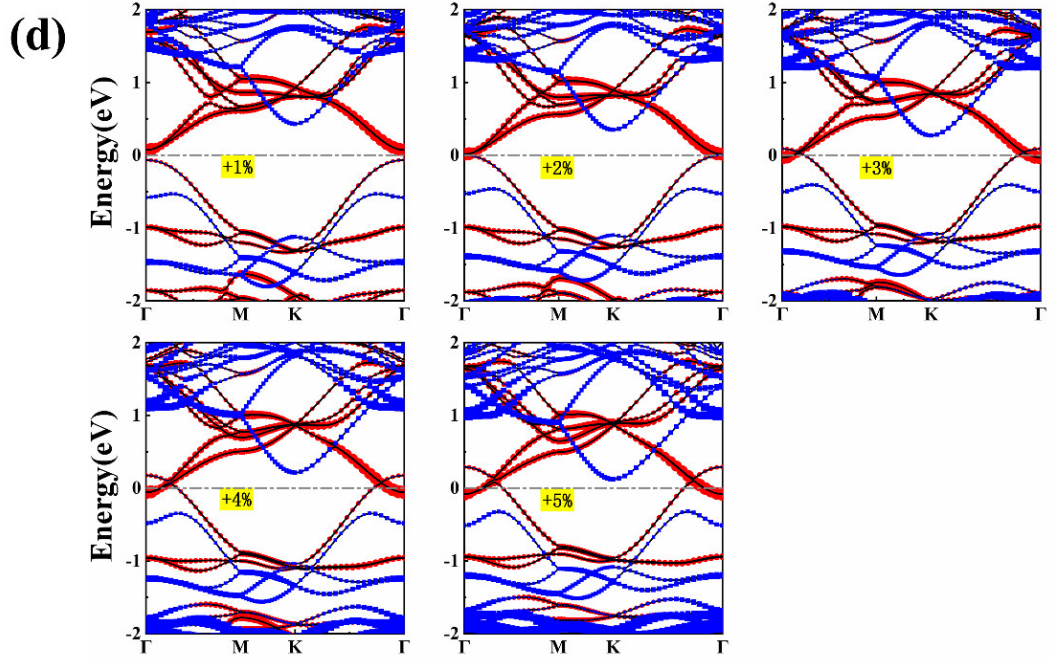

**Figure S3.** Band structures of (a) (b)  $\text{Te}_4\text{-MoSTe/MoGe}_2\text{N}_4$  vdWH, (c) (d)  $\text{S}_4\text{-MoSTe/MoGe}_2\text{N}_4$  vdWH under biaxial strains. The red and blue represent the weights from Janus MoSTe and  $\text{MoGe}_2\text{N}_4$  monolayers, respectively. Negative and positive values mean compressive stress and tensile stress.

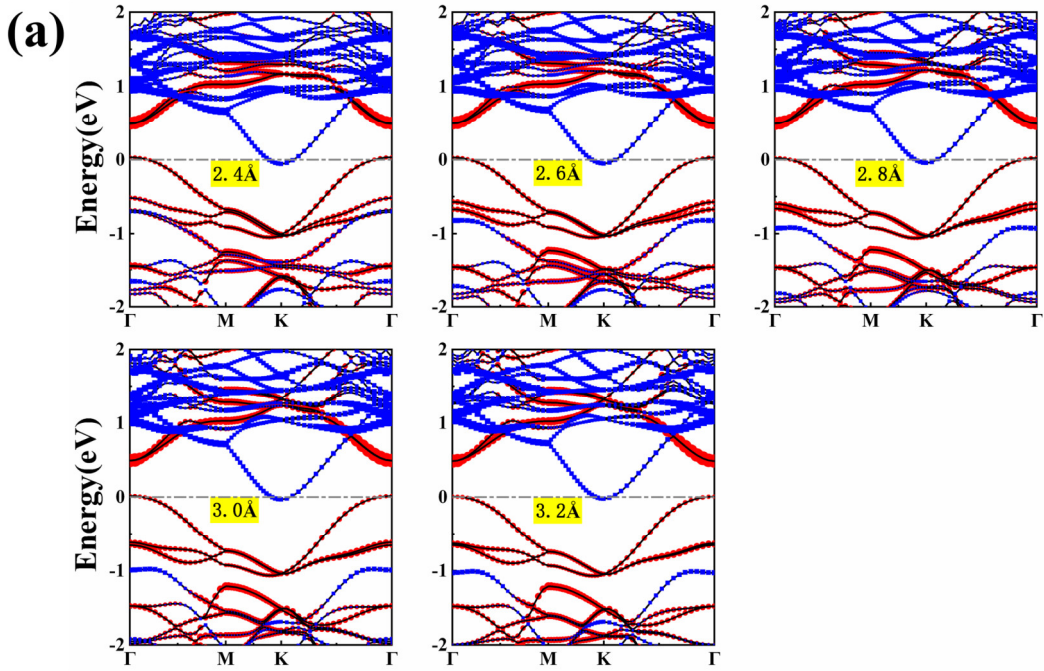

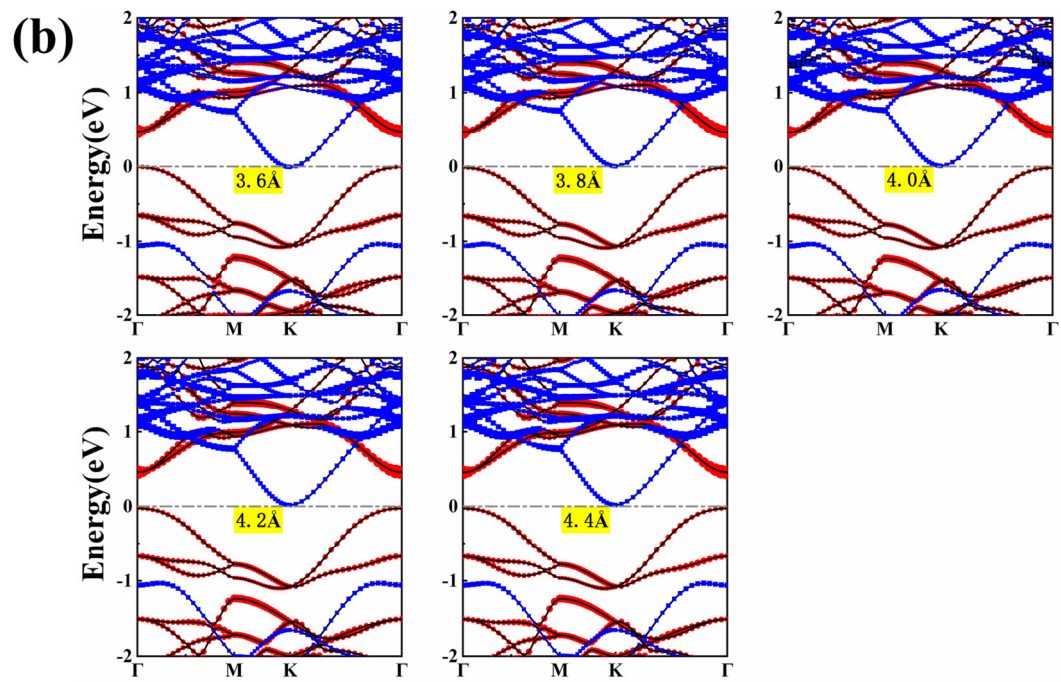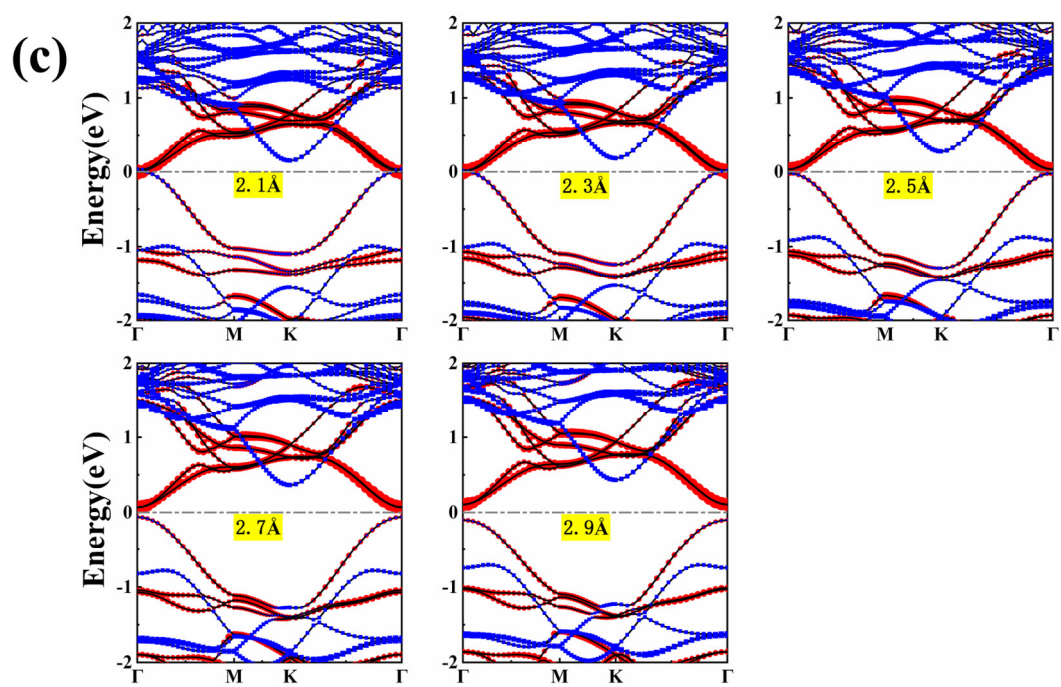

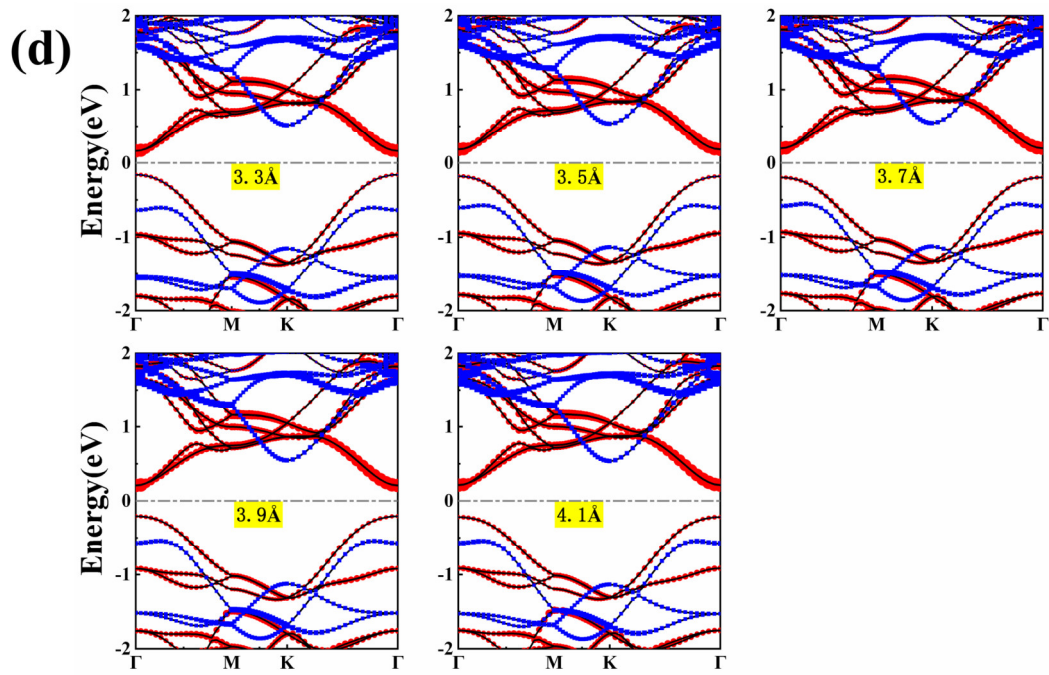

**Figure S4.** Band structures of (a) (b)  $\text{Te}_4\text{-MoSTe/MoGe}_2\text{N}_4$  vdWH, (c) (d)  $\text{S}_4\text{-MoSTe/MoGe}_2\text{N}_4$  vdWH under different inter-layer distances, where the equilibrium interlayer distances are 3.4 Å and 3.1 Å, respectively. The red and blue represent the weights from Janus MoSTe and MoGe<sub>2</sub>N<sub>4</sub> monolayers, respectively. .
